# Supplementary material for: Associations of Lifestyle Factors with Osteopenia and Osteoporosis in Polish Patients with Inflammatory Bowel Disease
Source: MDPI journal article supplement (doi:10.3390/nu13061863), 2021-05-30
Supplement: s1 [file s1]

**Supplementary Table S1.** Demographic characteristic parameters of the study IBD patients stratified by osteoporosis and osteopenia.

| Demografic Characteristics | All Subject (IBD) | Osteopenia and Osteoporosis | Normal BMD    | p-Value    |
|----------------------------|-------------------|-----------------------------|---------------|------------|
| N (%)                      | 208               | 108 (48,1%)                 | 100 (51,9%)   |            |
| Age (Years)                | 37,69 ± 14,02     | 40,23 ± 14,73               | 34,94 ± 12,72 | p = 0,0096 |
| Weight (kg)                | 65,91 ± 14,47     | 62,06 ± 13,93               | 70,06 ± 13,95 | p= 0,0001  |
| Hight (m)                  | 171,09 ± 9,97     | 168,69 ± 9,87               | 173,69 ± 9,45 | p= 0,0004  |
| BMI (kg/m <sup>2</sup> )   | 22,41 ± 4,1       | 21,72 ± 4,16                | 23,15 ± 3,93  | p= 0,0066  |

BMI – body mass index; IBD – inflammatory bowel disease; BMD – bone mineral density.

**Supplementary Table S2.** Lifestyle characteristic parameters of the study IBD patients stratified by osteoporosis and osteopenia.

| Demografic Characteristics | All Subject (IBD) | Osteopenia and Osteoporosis | Normal BMD  | p-Value   |
|----------------------------|-------------------|-----------------------------|-------------|-----------|
| N (%)                      | 208               | 108 (48,1%)                 | 100 (51,9%) |           |
| Smoker N (%)               | 36 (17,3 %)       | 17 (15,7 %)                 | 19 (19 %)   | p= 0,5537 |
| Alcohol consumption N (%)  | 78 (37,5 %)       | 40 (37 %)                   | 38 (38 %)   | p= 0,886  |
| Coffee drinker N (%)       | 124 (59,6 %)      | 64 (59,3 %)                 | 60 (60 %)   | p= 0,9134 |
| Exercise N (%)             | 128 (61,5 %)      | 61 (56,5 %)                 | 67 (67 %)   | p= 0,1193 |

IBD – inflammatory bowel disease; BMD – bone mineral density.
